# Supplementary material for: Ninjinyoeito Ameliorated Cigarette Smoke Extract-induced Apoptosis and Inflammation Through JNK Signaling Inhibition in Human Lung Fibroblasts
Source: Research Square preprint supplement (doi:10.21203/rs.3.rs-941651/v1), 2021-10-27
Supplement: Supplementary file 1 [file 22ac45e4632464670d9ffd8f.xlsx]

## Sheet: Sheet1
	Table 1: Medical herb composition of NYT
	English name	Latin Name	Botanical name	Weight (g)
	Rehmannia Root	Rehmanniae Radix	Rehmannia glutinosa (Gaertn.) Libosch. ex Fisch. et C.A. Mey.	4
	Japanese Angelica Root	Angelicae Acutilobae Radix	Angelica acutiloba (Siebold et Zucc.) Kitag.	4
	Atractylodes Rhizome	Atractylodis Rhizoma	Atractylodes japonica Koidz. ex Kitam.	4
	Poria Sclerotium	Poria	Wolfiporia cocos Ryvarden et Gilbertson	4
	Ginseng	Ginseng Radix	Panax ginseng C.A.Mey.	3
	Cinnamon Bark	Cinnamomi Cortex	Cinnamomum cassia (L.) J.Presl	2.5
	Polygala Root	Polygalae Radix	Polygala tenuifolia Willd.	2
	Peony Root	Paeoniae Radix	Paeonia lactiflora Pall.	2
	Citrus Unshiu Peel	Citri Unshiu Pericarpium	Citrus unshiu Markowicz	2
	Astragalus Root	Astragali Radix	Astragalus membranaceus (Fisch.) Bunge	1.5
	Glycyrrhiza	Glycyrrhizae Radix	Glycyrrhiza uralensis Fisch.	1
	Schisandra Fruit	Schisandrae Fructus	Schisandra chinensis (Turcz.) Baill.	1
