# Supplementary material for: Ninjinyoeito Ameliorated Cigarette Smoke Extract-induced Apoptosis and Inflammation Through JNK Signaling Inhibition in Human Lung Fibroblasts
Source: Research Square preprint supplement (doi:10.21203/rs.3.rs-941651/v1), 2021-10-27
Supplement: Supplementary file 2 [file 6e454d416295a13554db9371.docx]

**Supplementary Figure 1**

The full-length blot images for cleaved PARP and caspase 3

**Supplementary Figure 2**

The full-length blot images for ERK1/2, JNK, p38 and MKK4.
